# Supplementary material for: Effect of ionic strength and type of ions on the structure of water swollen polyelectrolyte multilayers
Source: Royal Society of Chemistry journal article supplement (doi:10.1039/c0cp01357a), 2011-01-01
Supplement: c0cp01357a.pdf [file c0cp01357a.pdf]

## Water Content in H<sub>2</sub>O

| Concentration of salt | void water<br>$\Phi_{\text{void}}$ (%) | swell water<br>$\Phi_{\text{swell}}$ (%) | total water<br>$\Phi_{\text{total}}$ (%) |
|-----------------------|----------------------------------------|------------------------------------------|------------------------------------------|
| <b>0.25 M NaF</b>     | 10.6 ± 0.3                             | 26.0 ± 0.8                               | 36.6 ± 0.5                               |
| <b>0.5 M NaF</b>      | 13.2 ± 0.4                             | 38.3 ± 1.0                               | 51.5 ± 0.6                               |
| <b>0.1 M NaCl</b>     | 9.1 ± 0.4                              | 36.2 ± 0.8                               | 45.3 ± 0.5                               |
| <b>0.25 M NaCl</b>    | 7.2 ± 0.7                              | 42.6 ± 1.3                               | 49.8 ± 0.8                               |
| <b>0.5 M NaCl</b>     | 2.7 ± 0.2                              | 53.8 ± 1.3                               | 56.5 ± 1.2                               |
| <b>0.1 M NaBr</b>     | 4.2 ± 0.6                              | 42.1 ± 1.9                               | 46.3 ± 2.1                               |
| <b>0.25 M NaBr</b>    | 2.8 ± 0.2                              | 61.2 ± 1.4                               | 64.0 ± 1.3                               |

## Water Content in D<sub>2</sub>O

| Concentration of salt | void water<br>$\Phi_{\text{void}}$ (%) | swell water<br>$\Phi_{\text{swell}}$ (%) | total water<br>$\Phi_{\text{total}}$ (%) |
|-----------------------|----------------------------------------|------------------------------------------|------------------------------------------|
| <b>0.25 M NaF</b>     | 12.6 ± 0.3                             | 26.1 ± 0.8                               | 38.7 ± 3.2                               |
| <b>0.5 M NaF</b>      | 13.3 ± 0.4                             | 38.5 ± 1.0                               | 51.8 ± 0.7                               |
| <b>0.1 M NaCl</b>     | 7.4 ± 0.4                              | 35.8 ± 0.9                               | 43.2 ± 0.5                               |
| <b>0.25 M NaCl</b>    | 7.1 ± 0.7                              | 42.7 ± 1.0                               | 49.8 ± 0.8                               |
| <b>0.5 M NaCl</b>     | 2.8 ± 0.2                              | 56.6 ± 1.1                               | 59.4 ± 1.2                               |
| <b>0.1 M NaBr</b>     | 5.0 ± 0.6                              | 39.2 ± 1.3                               | 44.2 ± 1.8                               |
| <b>0.25 M NaBr</b>    | 3.1 ± 0.4                              | 58.5 ± 2.0                               | 61.6 ± 2.5                               |
